# Supplementary material for: When in doubt, Google it: distress-related information seeking in Italy during the COVID-19 pandemic
Source: Springer Nature journal article supplement (doi:10.1186/s12889-021-11887-2), 2021-10-20

**ansia**  
Termine di ricerca

+ Confronta

Italia 25/01/20 - 17/10/20 Tutte le categorie Ricerca Google

Interesse nel tempo

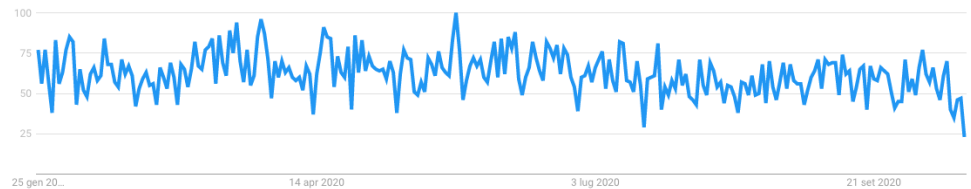

**depressione**  
Termine di ricerca

+ Confronta

Italia 25/01/20 - 17/10/20 Tutte le categorie Ricerca Google

Interesse nel tempo

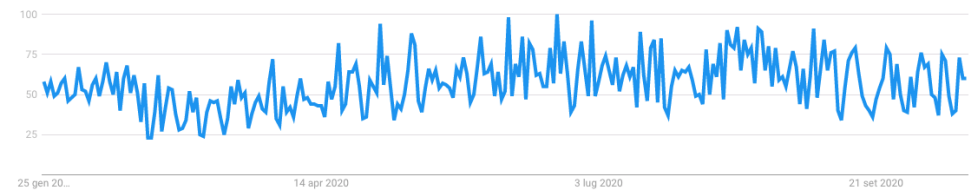

**insonnia**  
Termine di ricerca

+ Confronta

Italia 25/01/20 - 17/10/20 Tutte le categorie Ricerca Google

Interesse nel tempo

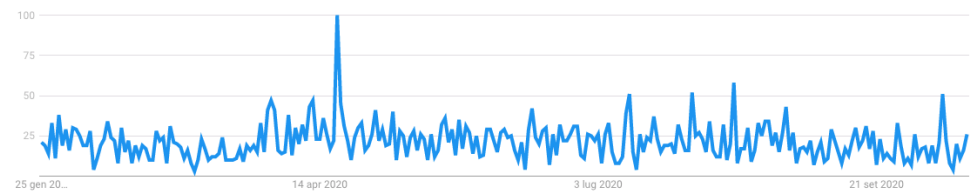

● **casi covid**  
Termine di ricerca

+ Confronta

Italia 25/01/20 - 17/10/20 Tutte le categorie Ricerca Google

Interesse nel tempo

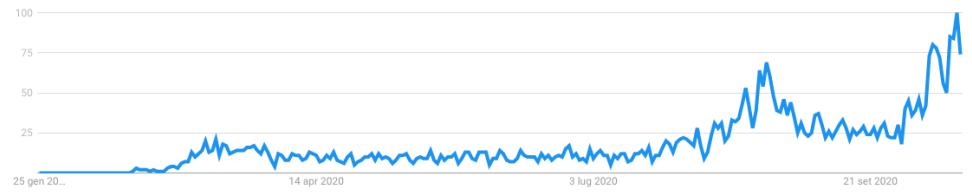

● **casi coronavirus**  
Termine di ricerca

+ Confronta

Italia 25/01/20 - 17/10/20 Tutte le categorie Ricerca Google

Interesse nel tempo

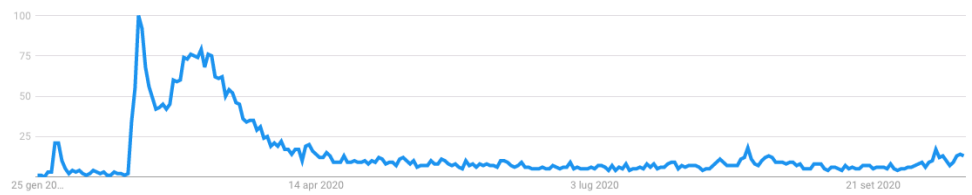

Supplement: MOESM1 [file 19777252]
